# Supplementary material for: Enhanced photocatalytic properties of a chemically modified blue phosphorene
Source: Royal Society of Chemistry journal article supplement (doi:10.1039/d0ra10829d), 2021-01-01
Supplement: d0ra10829d1.pdf [file d0ra10829d1.pdf]

## Supplementary Information

# Enhanced photocatalytic properties of a chemically modified blue phosphorene

Ashakiran Maibam,<sup>a,b,#</sup> Sawan Kumar Das,<sup>a#</sup>, Pragnya paramita Samal<sup>a,b</sup> Sailaja Krishnamurthy<sup>\*a,b</sup>

<sup>a</sup>Physical and Materials Chemistry Division,

National Chemical Laboratory, Pashan Road, Pune 411008, India

<sup>b</sup>Academy of Scientific and Innovative Research, CSIR-Human Resource Development Centre (CSIR-HRDC) Campus, Postal Staff College area, Gaziabad, 201 002 Uttar Pradesh, India

e-mail: [k.sailaja@ncl.res.in](mailto:k.sailaja@ncl.res.in), [sailaja.raaj@gmail.com](mailto:sailaja.raaj@gmail.com)

### Contents:

1. S.F.1: Six lowest energy conformations of 1S-B-phosphorene.
2. S.F.2: Six lowest energy conformations of 2S-B-phosphorene.
3. S.F.3: Six lowest energy conformations of 3S-B-phosphorene.
4. S.F.4: Six lowest energy conformations of 4S-B-phosphorene.
5. S.F.5: Six lowest energy conformations of 5S-B-phosphorene.
6. S.F.6: Six lowest energy conformations of 6S-B-phosphorene.
7. S.F.7 : AIMD plots of 2S-B-phosphorene, 4S-B-phosphorene and 6S-B-phosphorene with sulphur dopants at C and C+E sites at 500K.
8. S.T.1: Table detailing various parameters for water activation.

# Equal contribution to the work

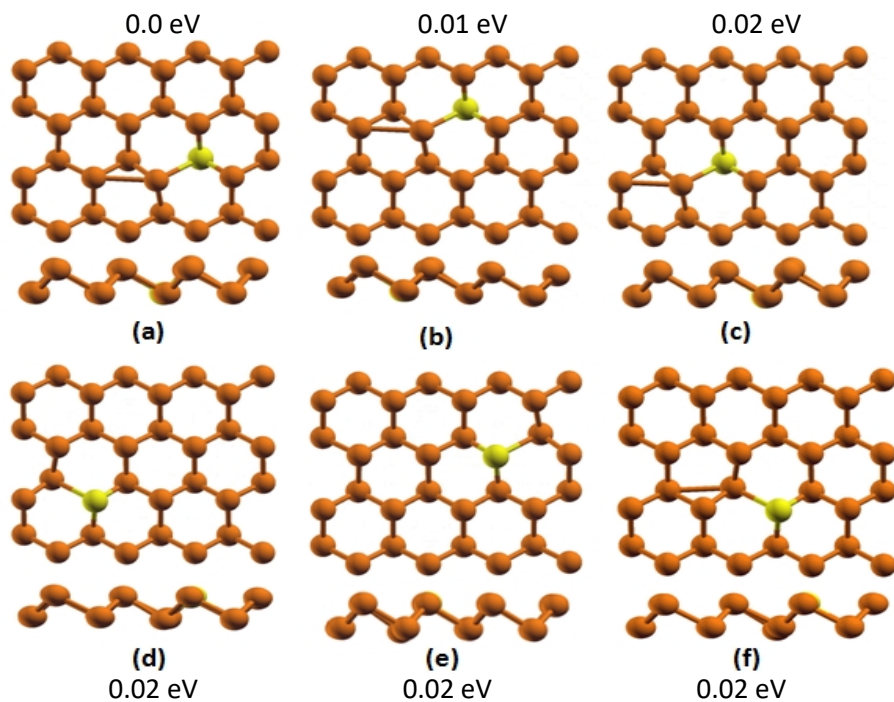

**S.F.1:** Six lowest energy conformations of 1S-B-phosphorene and relative energies are given in eV in top and bottom.

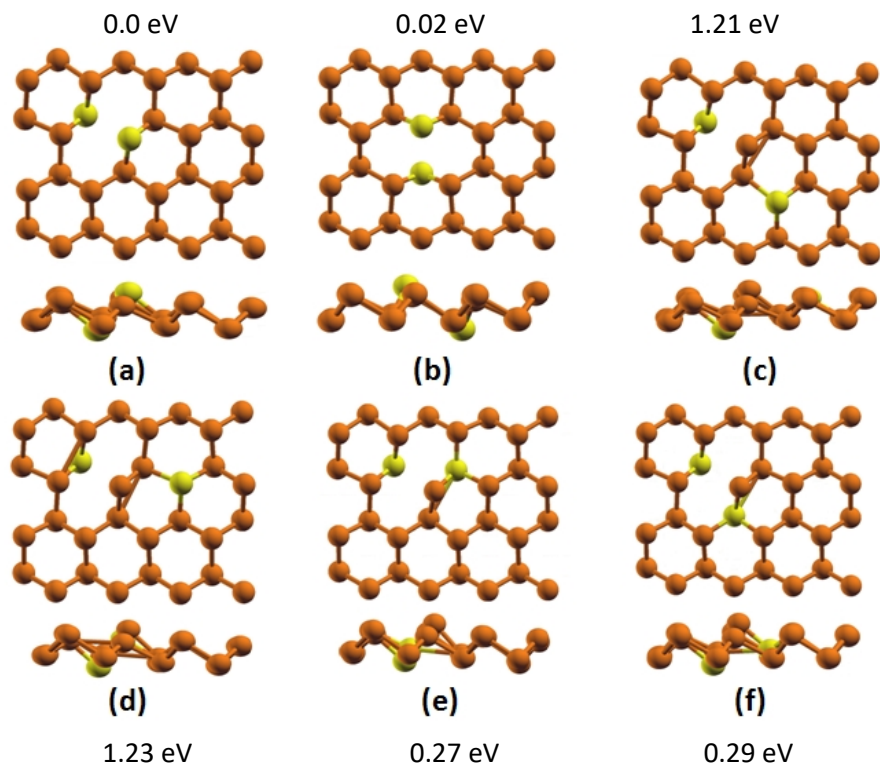

**S.F.2:** Six lowest energy conformations of 2S-B-phosphorene and relative energies are given in eV in top and bottom.

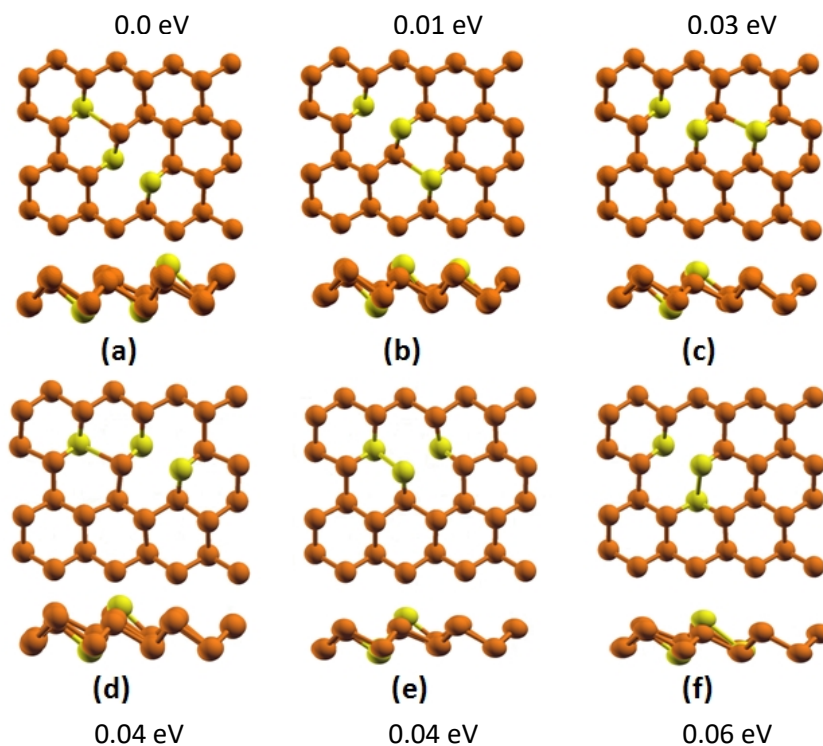

**S.F.3:** Six lowest energy conformations of 3S-B-phosphorene and relative energies are given in eV in top and bottom.

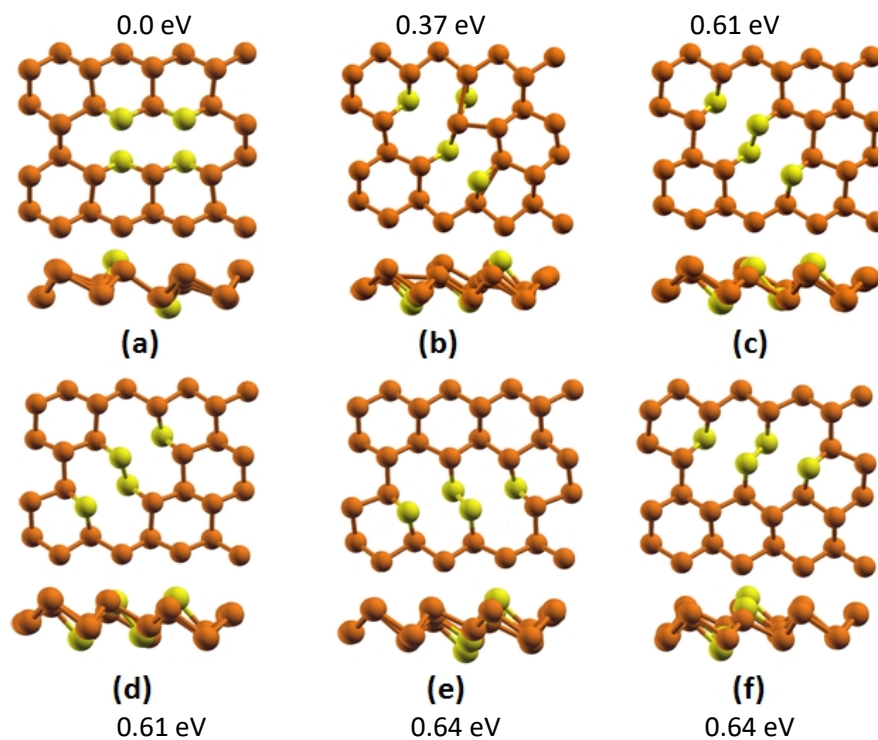

**S.F.4:** Six lowest energy conformations of 4S-B-phosphorene and relative energies are given in eV in top and bottom.

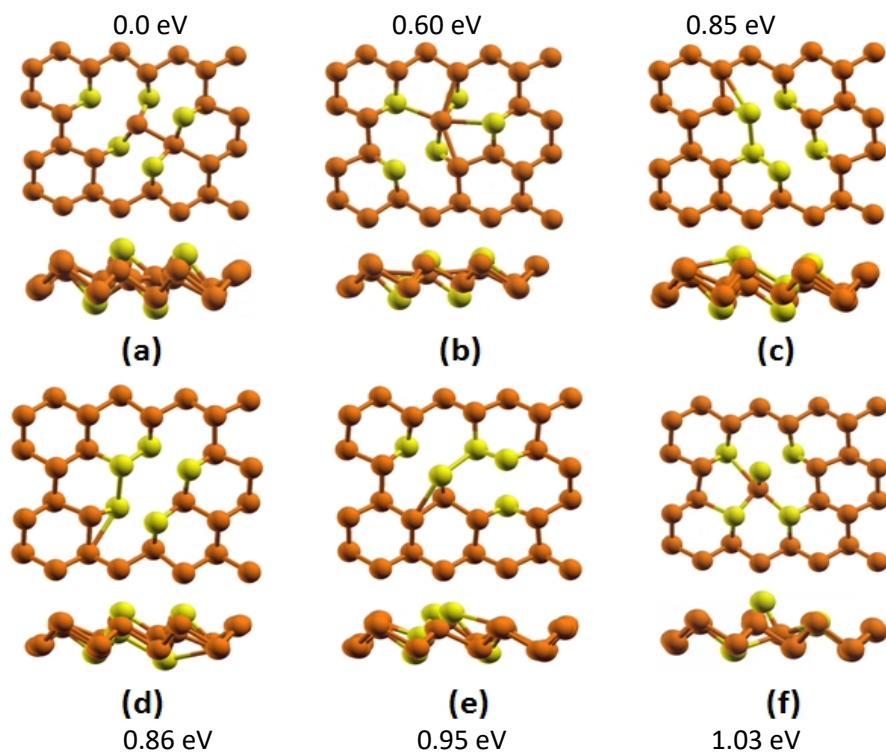

**S.F.5:** Six lowest energy conformations of 5S-B-phosphorene and relative energies are given in eV in top and bottom.

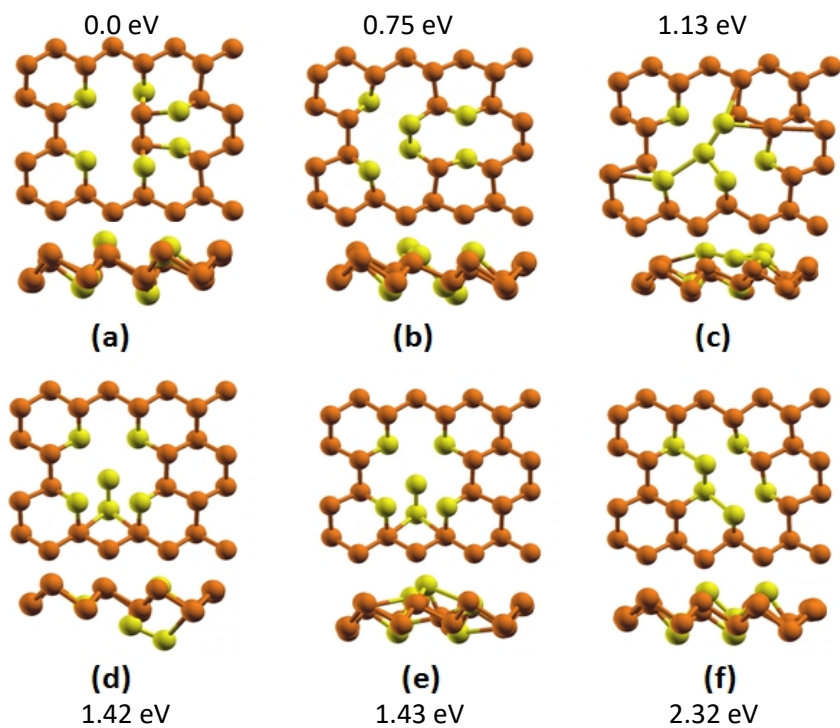

**S.F.6:** Six lowest energy conformations of 6S-B-phosphorene and relative energies are given in eV in top and bottom.

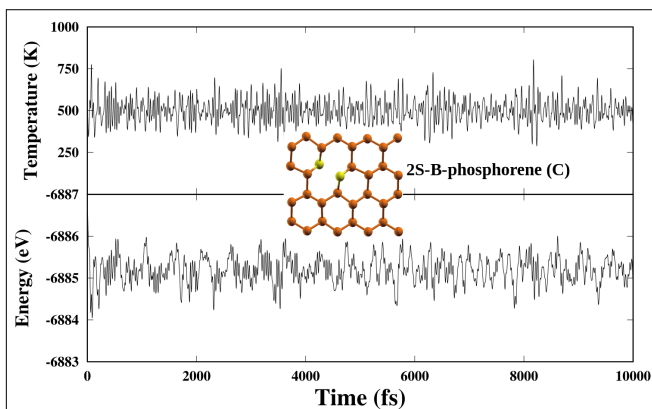

(a) 2-S-B-phosphorene(C) AIMD plot at 500K for 10 ps.

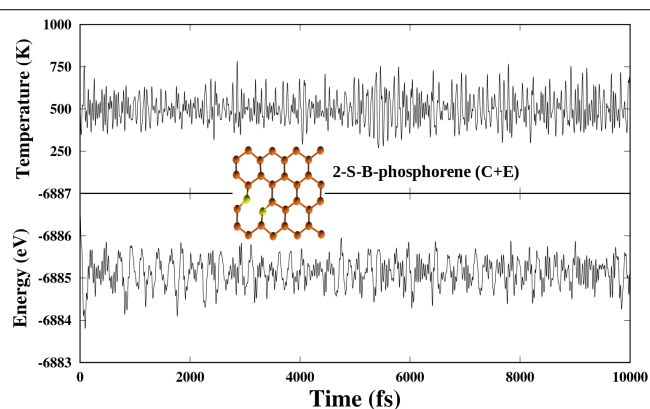

(b) 2-S-B-phosphorene(C+E) AIMD plot at 500K for 10 ps.

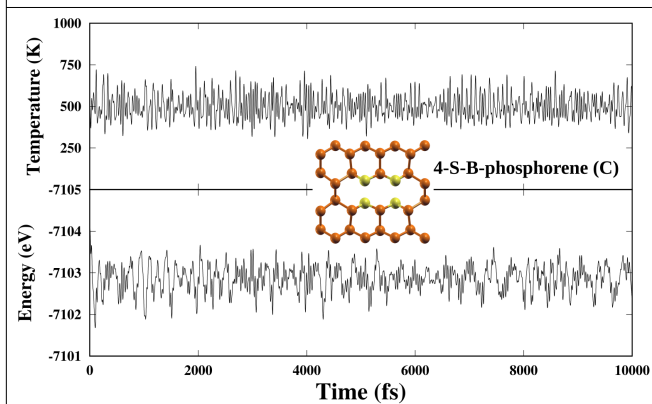

(c) 4-S-B-phosphorene(C) AIMD plot at 500K for 10 ps.

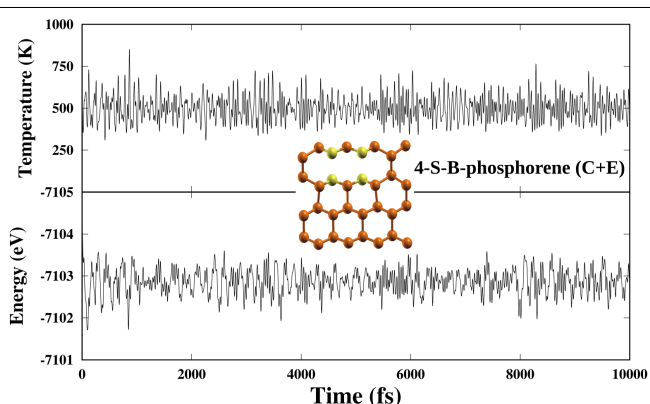

(d) 4-S-B-phosphorene(C+E) AIMD plot at 500K for 10 ps.

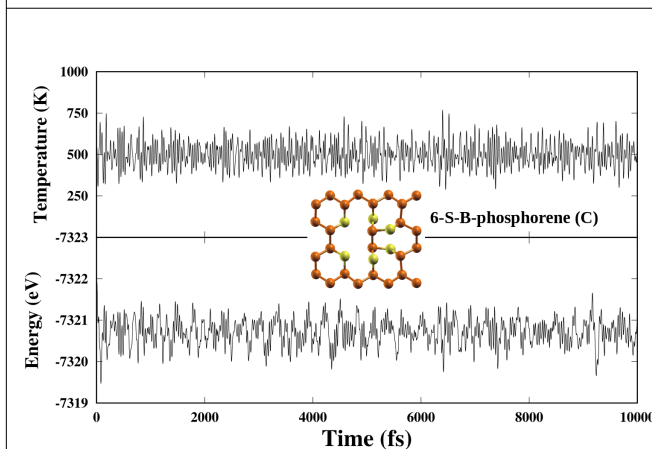

(e) 6-S-B-phosphorene(C) AIMD plot at 500K for 10 ps.

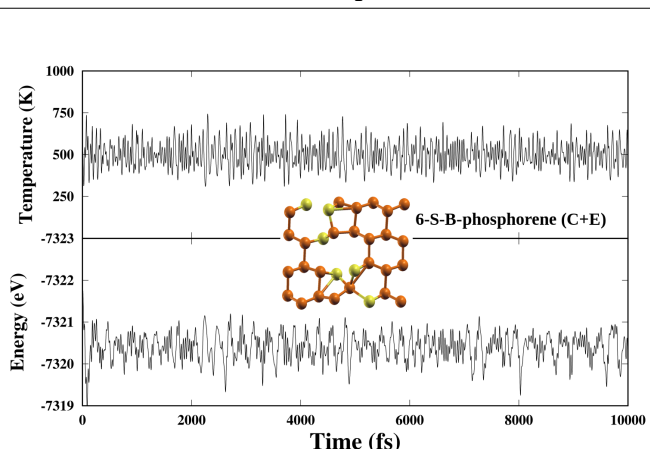

(f) 6-S-B-phosphorene(C+E) AIMD plot at 500K for 10 ps.

**S.F.7:** AIMD plots of 2S-B-phosphorene, 4S-B-phosphorene and 6S-B-phosphorene with sulphur dopants at C and C+E sites at 500K.

| <i>n</i> B-phosphorene | $E_{ad}$<br>(eV) | O-H<br>Bondlength<br>(Å) | O-H-O<br>angle<br>(°) | S-H<br>bond<br>distance<br>(Å) | $E_g$<br>(eV) | Symmetric<br>frequency of<br>OH <sub>1</sub><br>(cm <sup>-1</sup> ) | Asymmetric<br>frequency of<br>OH <sub>2</sub><br>(cm <sup>-1</sup> ) | Redshift in<br>Symmetric<br>frequency<br>(cm <sup>-1</sup> ) |       |
|------------------------|------------------|--------------------------|-----------------------|--------------------------------|---------------|---------------------------------------------------------------------|----------------------------------------------------------------------|--------------------------------------------------------------|-------|
| <b>2</b>               | C                | -0.50                    | 0.976,<br>0.976       | 104.3                          | 2.45          | 1.91                                                                | 3503.8                                                               | 3647.2                                                       | 203.8 |
|                        | E                | -0.59                    | 0.982,<br>0.971       | 106.4                          | 2.81          | 1.91                                                                | 3436.9                                                               | 3695.2                                                       | 270.6 |
|                        | <b>C+E</b>       | -0.58                    | 0.981,<br>0.970       | 106.4                          | 2.88          | 1.92                                                                | 3444.9                                                               | 3702.8                                                       | 262.6 |
|                        | <b>C+E</b>       | -0.51                    | 0.980,<br>0.972       | 104.6                          | 3.05          |                                                                     | 3448.6                                                               | 3684.0                                                       | 259   |
| <b>4</b>               | C                | -0.52                    | 0.974,<br>0.974       | 104.0                          | 2.42          | 1.71                                                                | 3525.7                                                               | 3659.1                                                       | 181.8 |
|                        | E                | -0.59                    | 0.981,<br>0.980       | 103.8                          | 2.25          | 1.82                                                                | 3430.3                                                               | 3553.1                                                       | 277.3 |
|                        | <b>C+E</b>       | -0.53                    | 0.974,<br>0.974       | 104.2                          | 2.43          | 1.75                                                                | 3529.6                                                               | 3669.7                                                       | 178   |
|                        | <b>C+E</b>       | -0.54                    | 0.978,<br>0.972       | 104.3                          | 2.31          |                                                                     | 3497.7                                                               | 3694.7                                                       | 209.9 |
| <b>6</b>               | C                | -0.59                    | 0.980,<br>0.973       | 105.3                          | 2.27          | 1.58                                                                | 3468.4                                                               | 3681.4                                                       | 239.2 |
|                        | E                | -0.55                    | 0.981,<br>0.971       | 105.5                          | 2.80          | 1.74                                                                | 3442.6                                                               | 3692.9                                                       | 265   |
|                        | <b>C+E</b>       | -0.65                    | 0.984,<br>0.975       | 104.4                          | 2.24          | 1.75                                                                | 3410.8                                                               | 3615.0                                                       | 296.8 |
|                        | <b>C+E</b>       | -0.61                    | 0.979,<br>0.973       | 104.9                          | 2.58          |                                                                     | 3488.7                                                               | 3677.7                                                       | 218.9 |
| <b>B-phosphorene</b>   | -0.43            | 0.976,<br>0.975          | 103.7                 | 2.40                           | 2.00          | 3504.2                                                              | 3628.4                                                               | 203.4                                                        |       |

**S.T.1:** Table detailing various parameters for water activation.

Where  $E_{ad}$  is the adsorption energy of water on PNS (Phosphorene Nanosheet)  $E_g$  is the bandgap of B-PNS without water, C- centre, E- Edge. The highlighted and red coloured letter in C+E corresponds to the site on which water molecule is adsorbed.
